# Supplementary material for: Transposon integration enhances expression of stress response genes
Source: PubMed Central journal article supplement — Nucleic Acids Res. 2012 Nov 26;41(2):775–89. doi: 10.1093/nar/gks1185 (PMC3553992; doi:10.1093/nar/gks1185), 2012-11-26

**Fig. S1\_Feng**

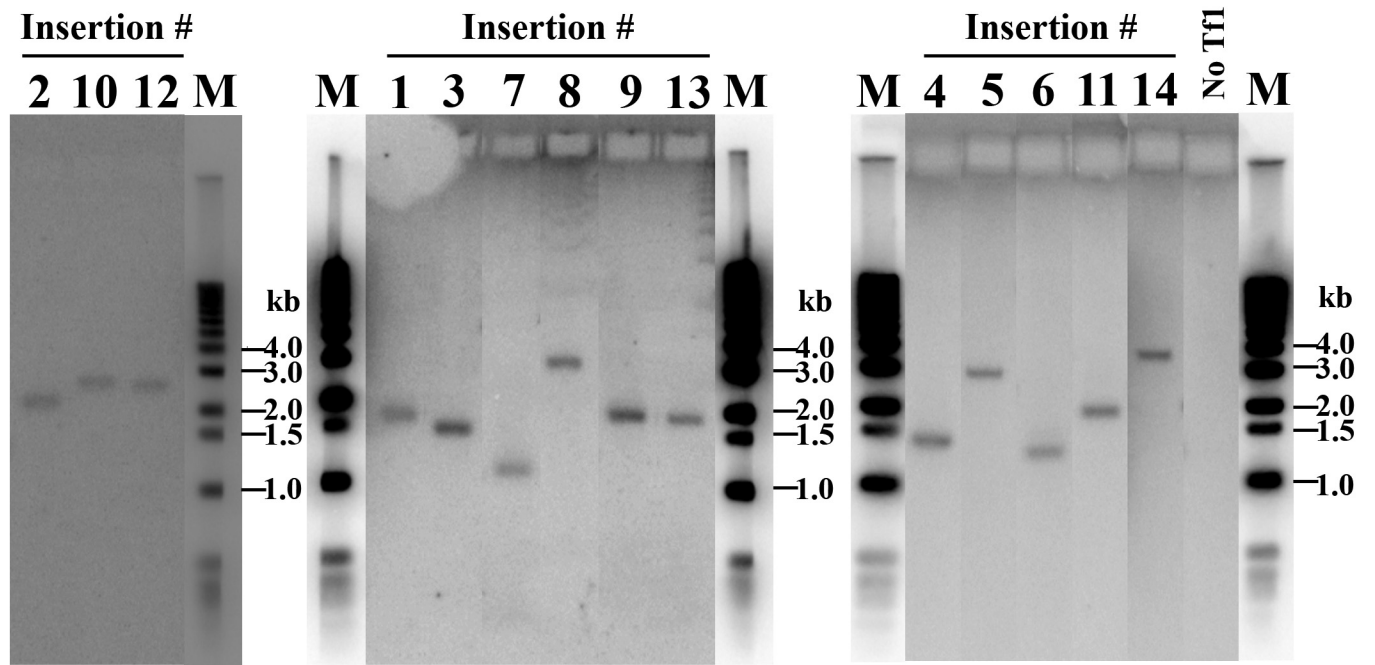

**Fig. S2\_Feng**

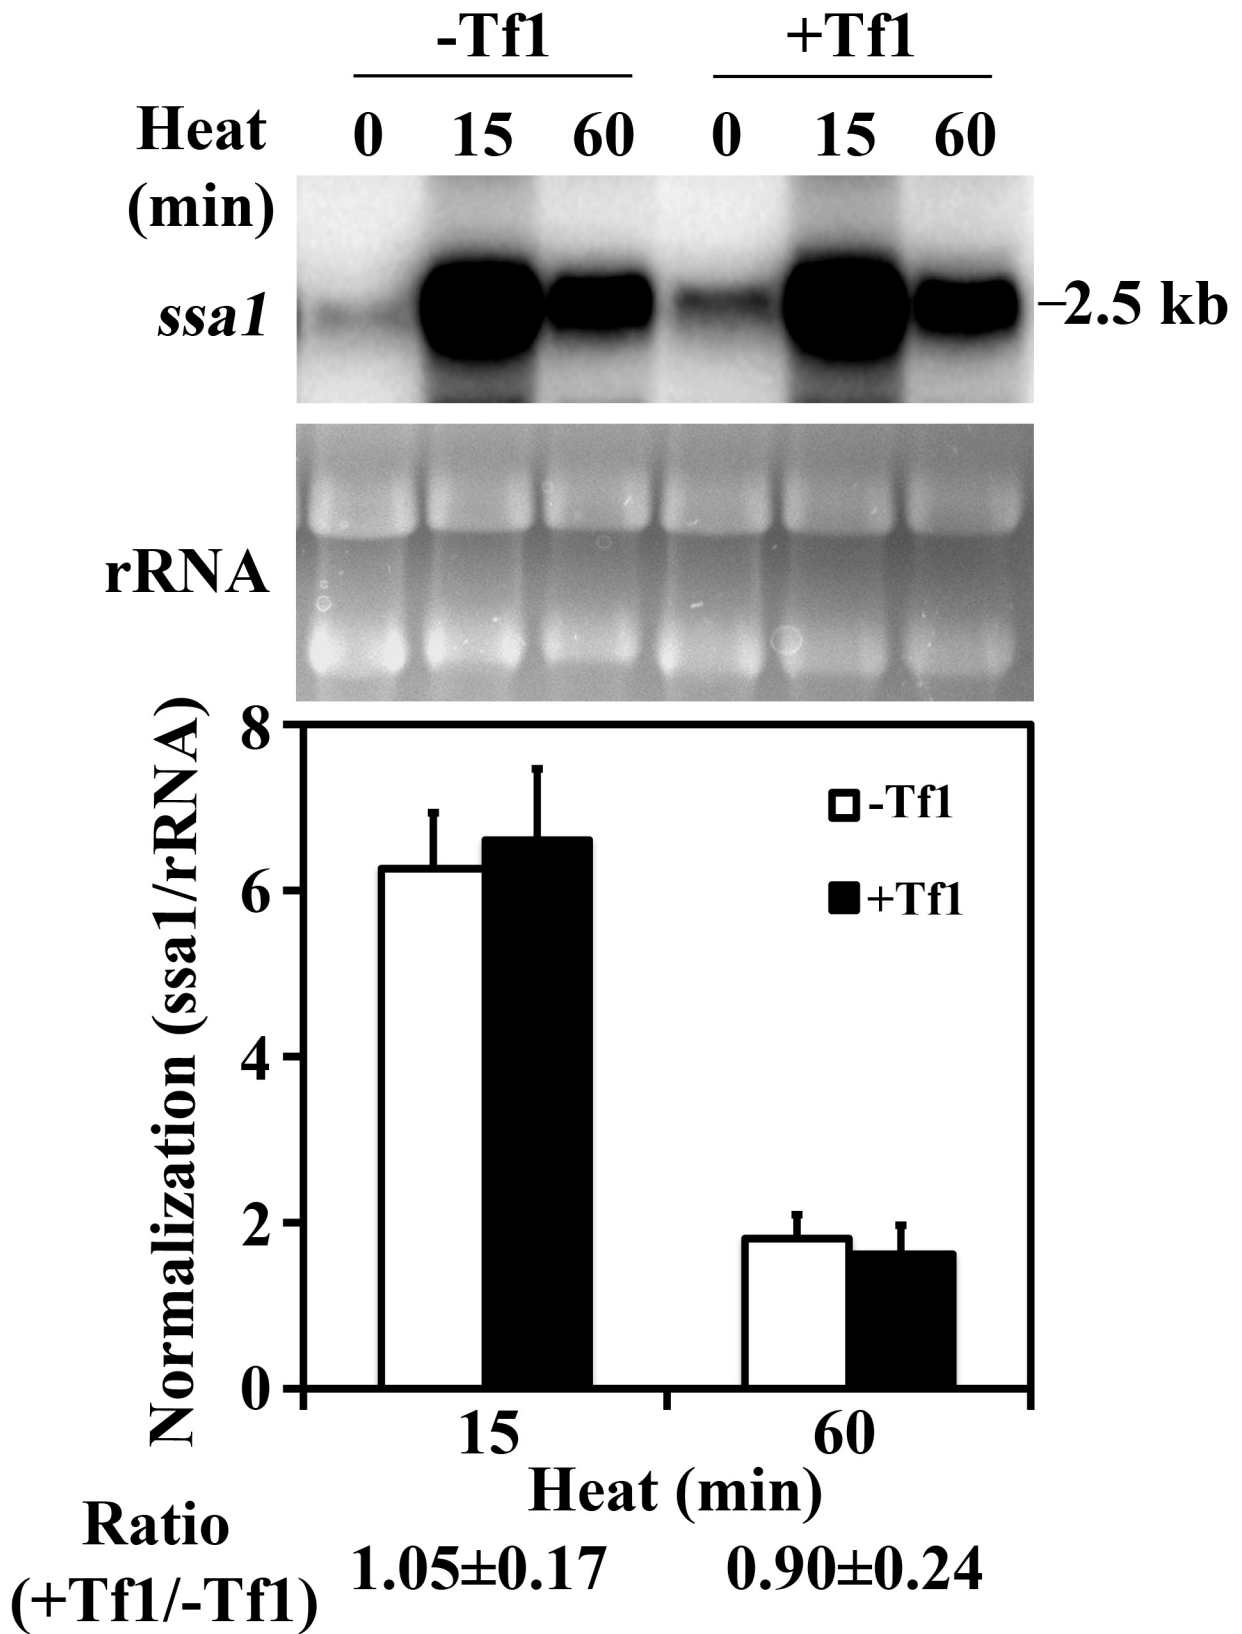

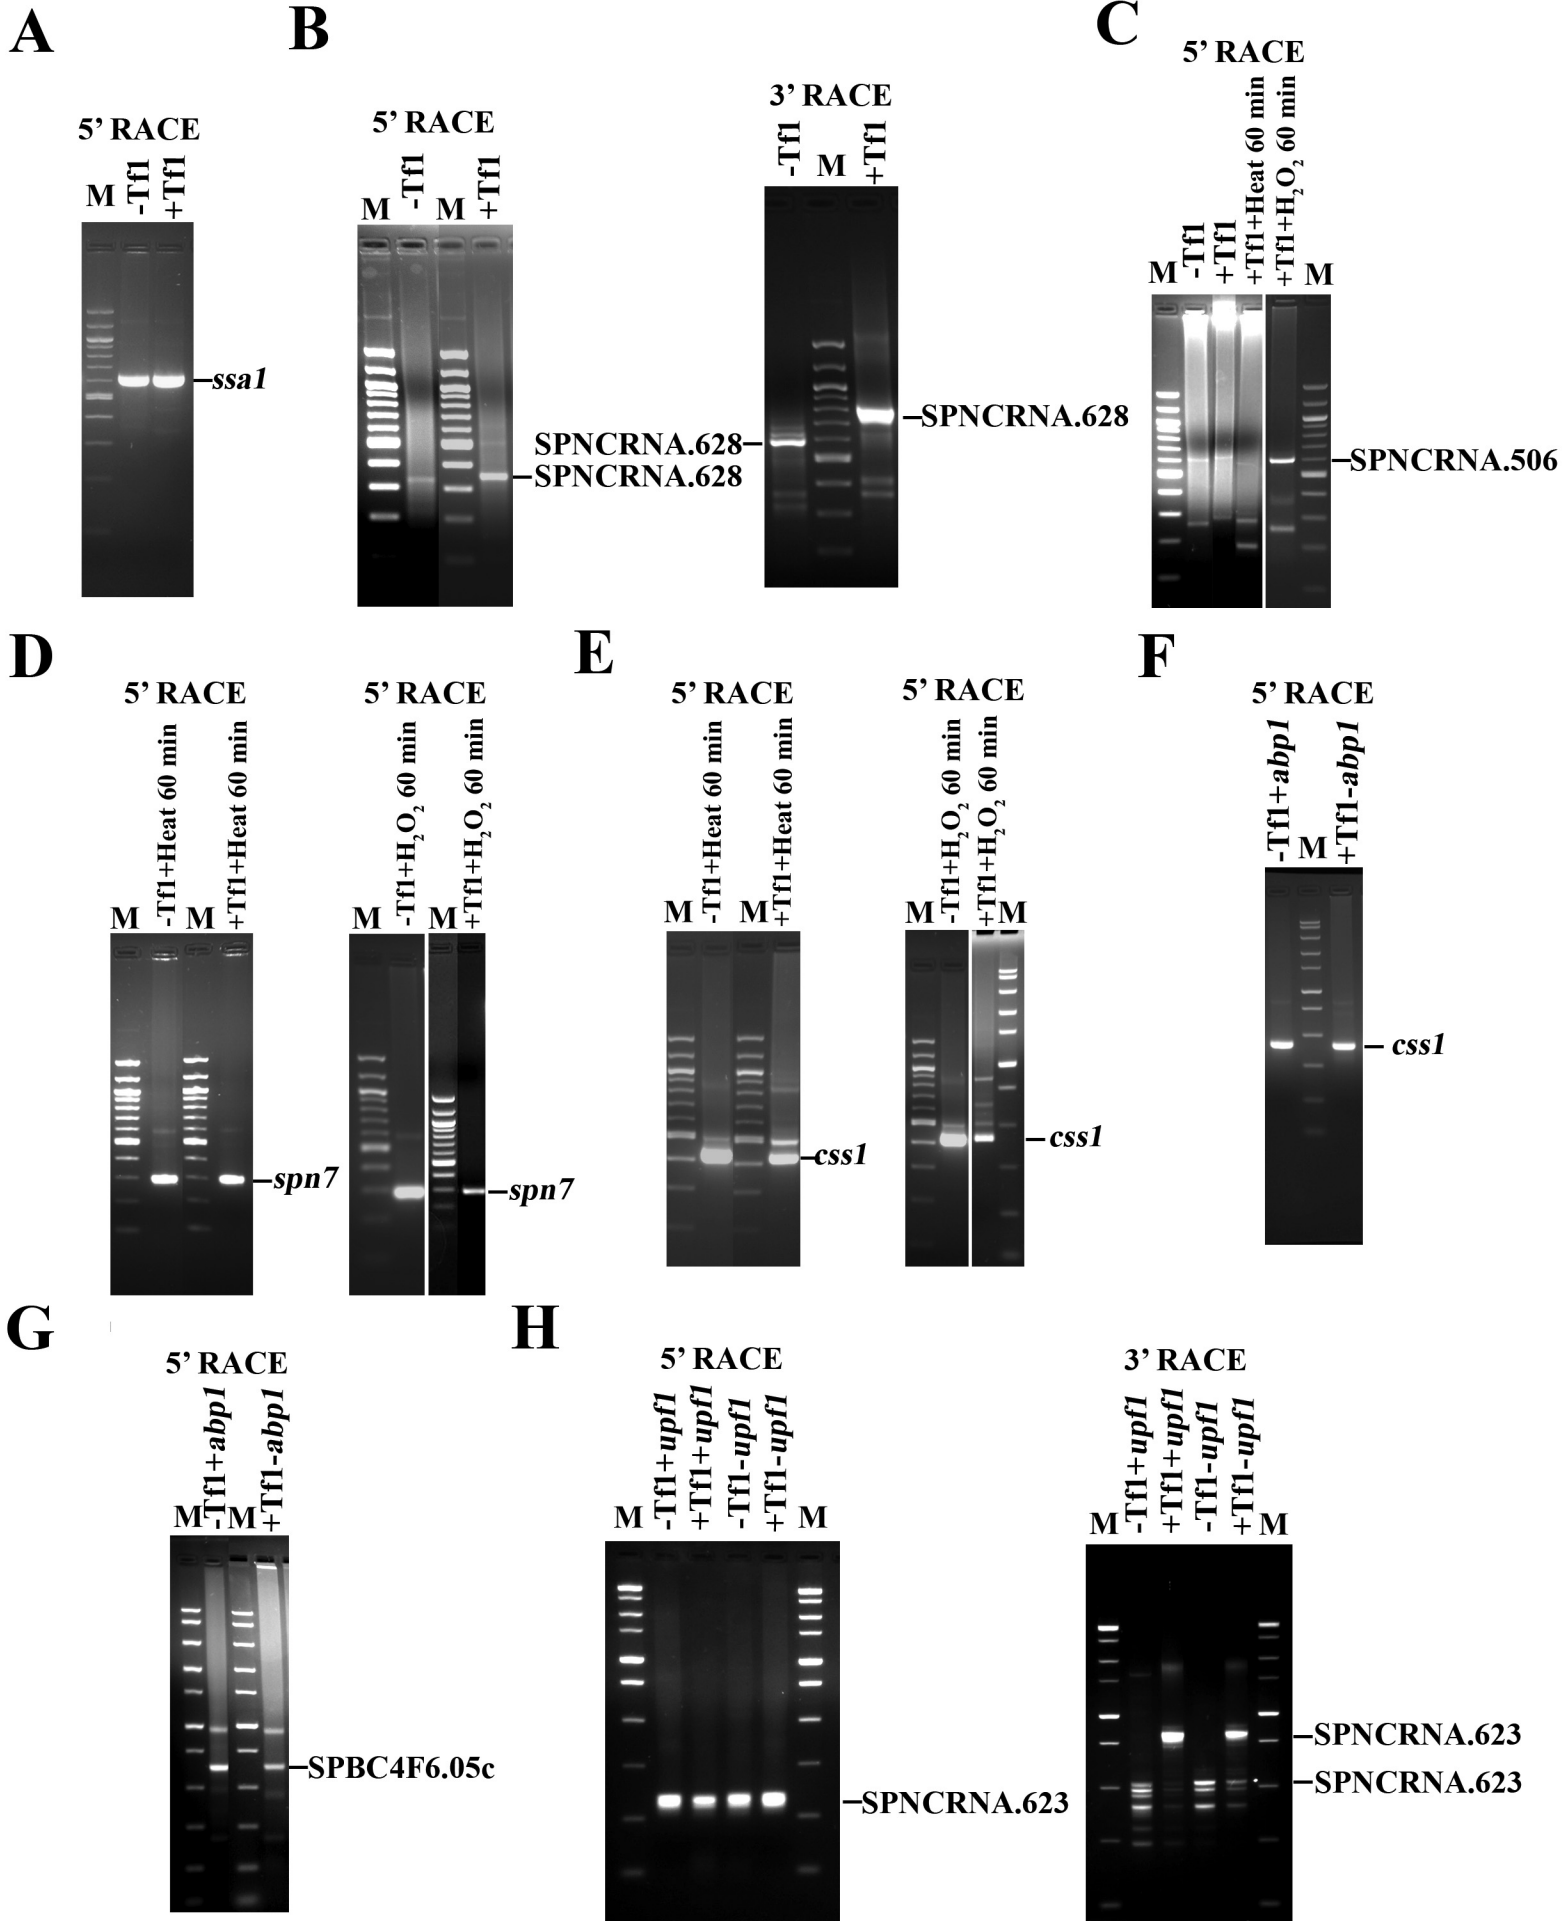

A

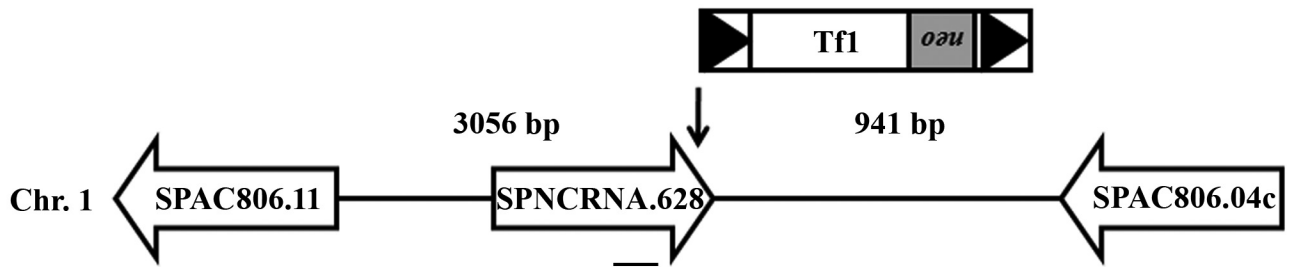

B

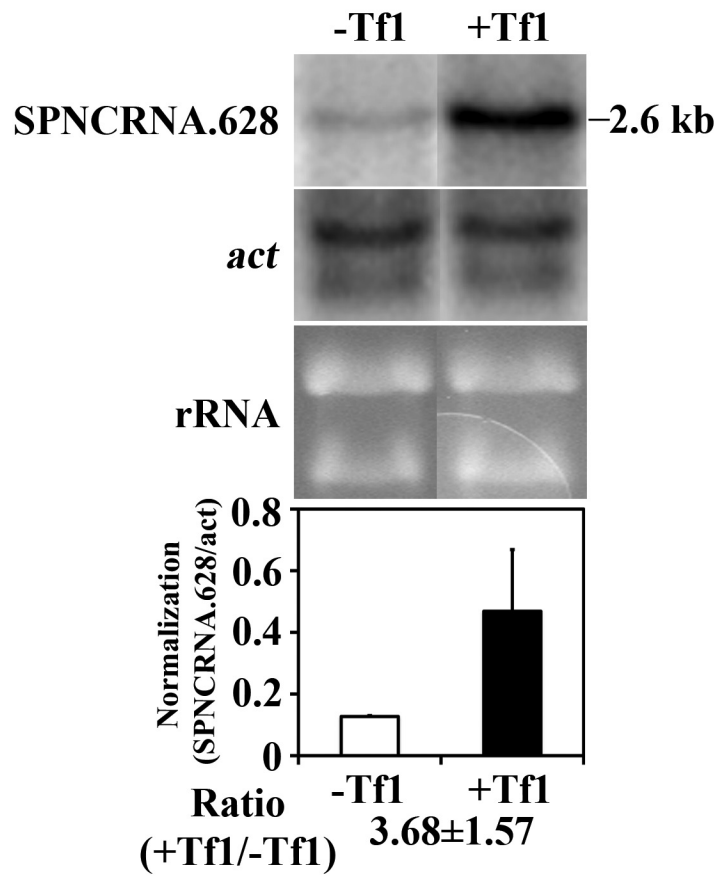

C

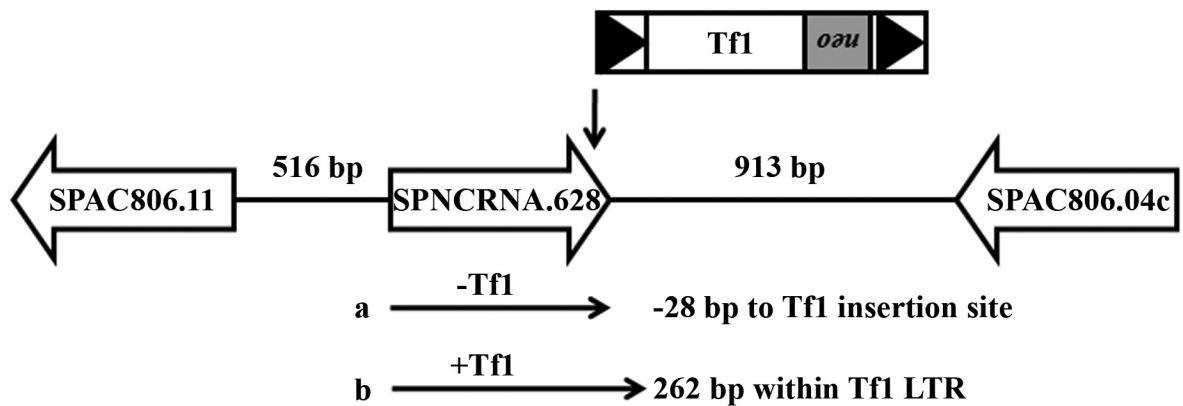

**Fig. S5\_Feng**

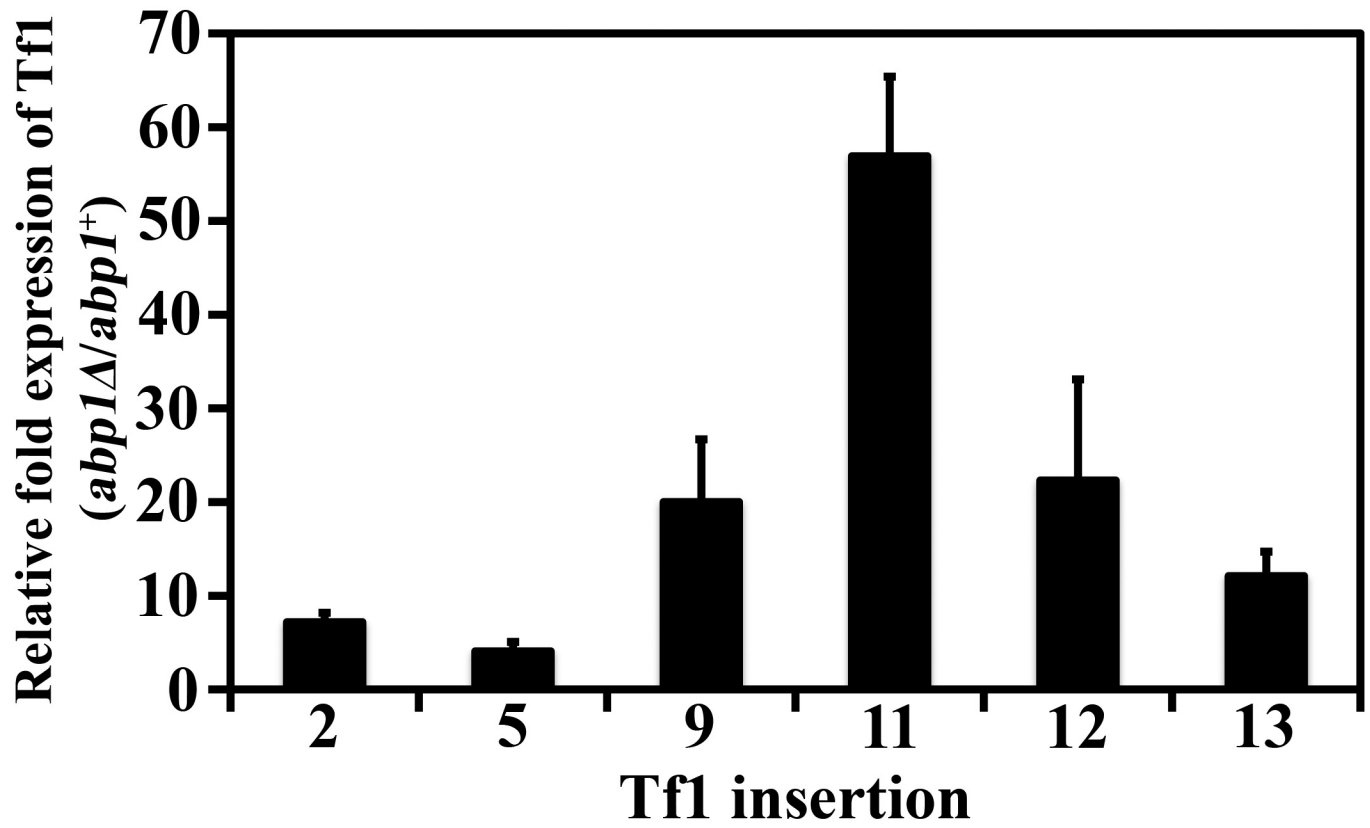

A

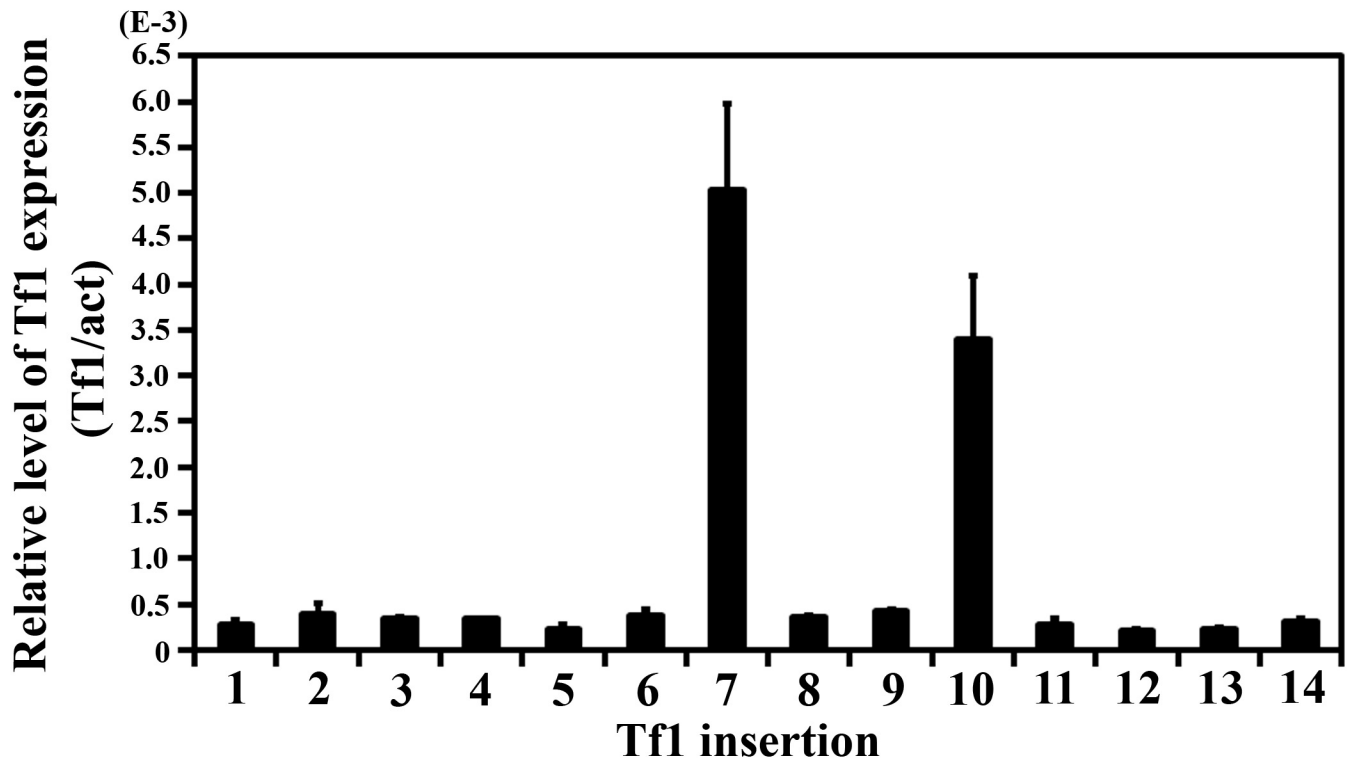

B

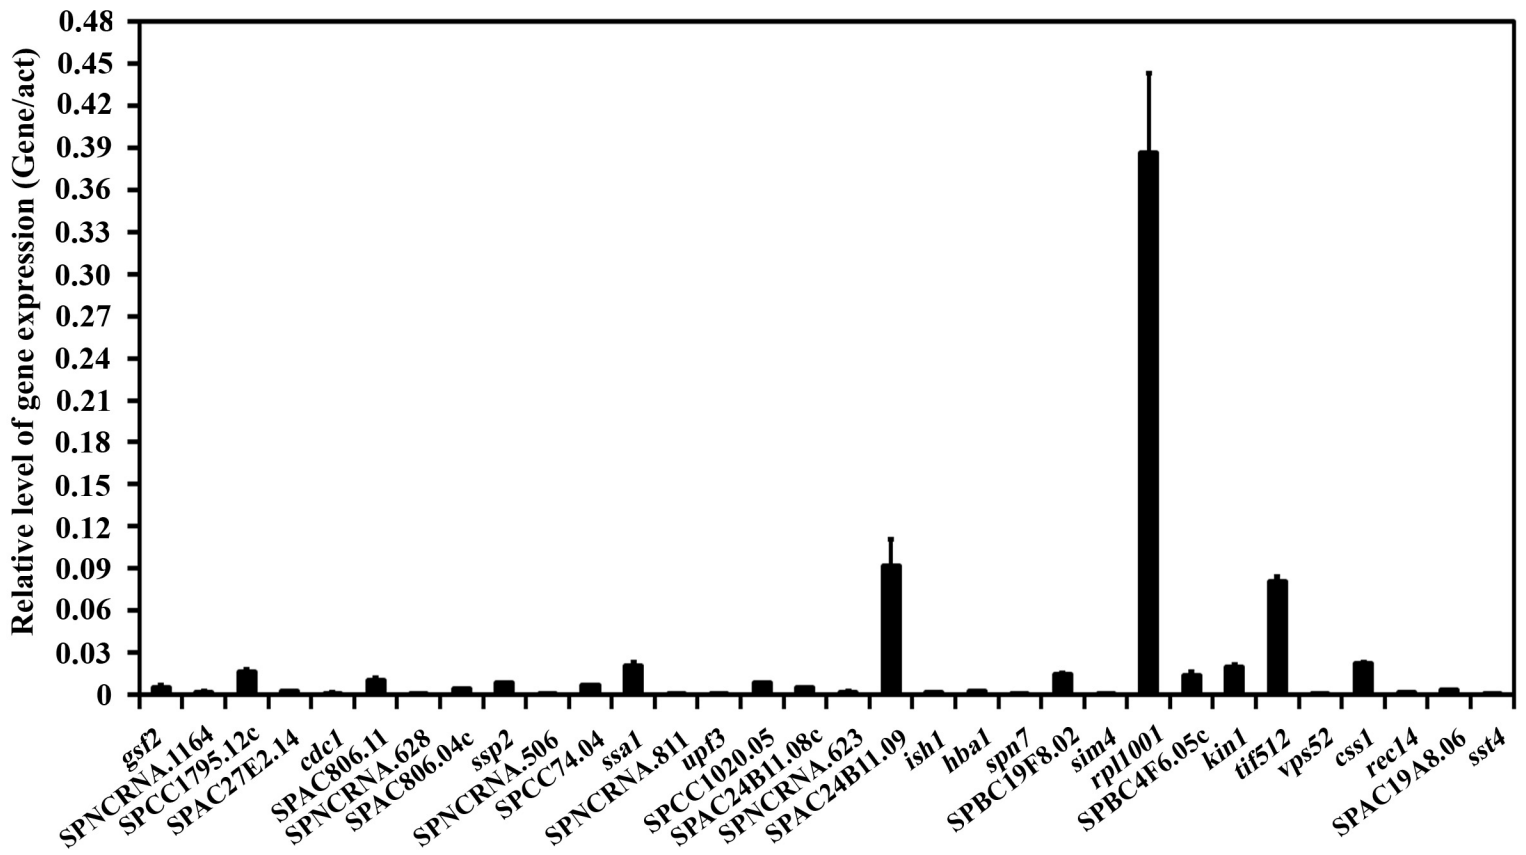

**A**

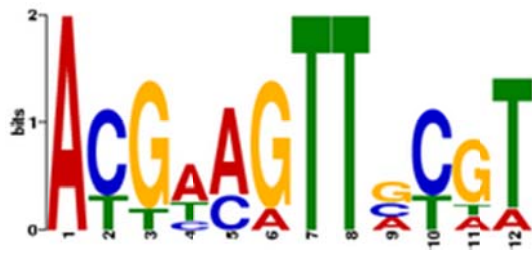

**D**

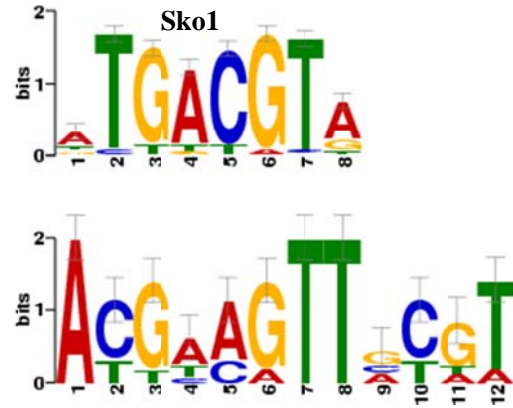

**B**

| Name        | <i>p</i> -value | Sites                                     |
|-------------|-----------------|-------------------------------------------|
| SPNCRNA.506 | 3.70e-08        | TTACTAGTTA <b>ACGAAGTTGCGT</b> CACAATGCGG |
| SPNCRNA.628 | 1.16e-06        | AATTTCCAGT <b>ATGTAGTTGCGT</b> TAAAAAACA  |
| css1        | 2.30e-06        | GTAAAAAATC <b>ACGCAGTTCTGT</b> GTACAATAAC |
| Tf1         | 2.49e-06        | GCTATGATAC <b>ACTACGTTGCGT</b> ATCACTATAT |
| SPNCRNA.811 | 1.50e-05        | CTTTTTCTAA <b>ATGACGTTACGA</b> TGTTCTACCA |
| spn7        | 1.69e-05        | CATTATGTTT <b>ACGAAGTTATAT</b> GTAGCAACGA |
| ssa1        | 3.22e-05        | GAGTATCGTA <b>ACGTAATTCCTT</b> GACTTCGTCA |

**C**

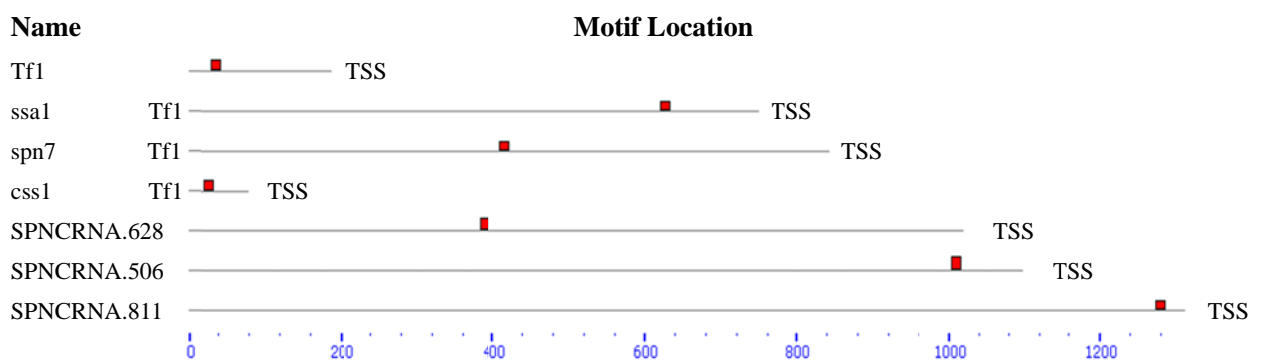

Supplement: supp_gks1185_nar-01795-a-2012-File008.pdf [file supp_gks1185_nar-01795-a-2012-File008.pdf]
